# Supplementary material for: Lipopolysaccharide Alters the m6A Epitranscriptomic Tagging of RNAs in Cardiac Tissue
Source: PubMed Central journal article supplement (PMC8355517; doi:10.3389/fmolb.2021.670160), 2021-07-28

## *Supplementary Material*

### 1 Supplementary Tables

**Supplementary Table S1.** Sequence of primers used for qRT-PCR analysis of mRNA levels

| Gene Name | Sequence                       | T <sub>m</sub> (°C) | Product Size (bp) |
|-----------|--------------------------------|---------------------|-------------------|
| GAPDH     | F:5' GCTCTCTGCTCCTCCCTGTTCTA3' | 60                  | 124               |
|           | R:5' TGGTAACCAGGCGTCCGATA3'    |                     |                   |
| METTL3    | F:5' TTGACTACAGTGGCTACCTTT3'   | 60                  | 220               |
|           | R:5' CCTTGGCTGTTGTGGTATT3'     |                     |                   |
| METTL14   | F:5' GAGTATGTTTGCGAAAGTGGG3'   | 60                  | 84                |
|           | R:5' TTGTCTTTCCAGGATTGTTCTT 3' |                     |                   |
| WTAP      | F:5' GAAAACTAAAGCAGCAACAG3'    | 60                  | 267               |
|           | R:5' CGTAAACTTCCAGGCACTC3'     |                     |                   |
| YTHDF1    | F:5' GCCAGGAGGAAGAGGAGGTA 3'   | 60                  | 131               |
|           | R:5' AGACAGCACCAAGCATAACAGC 3' |                     |                   |
| YTHDF3    | F:5' GCCATGCGAAGGGAGAGAA3'     | 60                  | 278               |
|           | R:5' AGCTTCAGGACACAAAGTGCT3'   |                     |                   |
| FTO       | F:5' GAGCGGGAAGCTAAGAAA 3'     | 60                  | 100               |
|           | R:5' GCTGCCACTGCTGATAGAA 3'    |                     |                   |

METTL3, methyltransferase-like 3; METTL14, methyltransferase-like 14; WTAP, Wilms tumor 1-associated protein; YTHDF1, YTH domain family 1; YTHDF3, YTH domain family 3; FTO, fat mass and obesity associated protein.

**Supplementary Table S2.** Sequence of primers used for m<sup>6</sup>A single base site qPCR analysis of relative mRNA methylation levels

| Gene Name | Sequence                                                       | T <sub>m</sub> (°C) | Product Size (bp) |
|-----------|----------------------------------------------------------------|---------------------|-------------------|
| XR_595034 | F:5' ATCTCATCCTGCCGCTCCTT3'<br>R:5' TCTCCGCCTCCAGCACTTA3'      | 60                  | 276               |
| XR_346771 | F:5' GAATTTGCTGAGTAAACACCCTAT3'<br>R:5' CACTGGTGGTCGCCTATTGT3' | 60                  | 147               |
| XR_338486 | F:5' TGTGGAGGGATCTGGTTCTTG3'<br>R:5' CTGCGGGACTGTATGGAGTG3'    | 60                  | 191               |
| XR_596592 | F:5' ATCTGACGGCAGGATTTGGAG 3'<br>R:5' TTGCACTTTGAGCGTGGACAT3'  | 60                  | 85                |
| Clec1b    | F:5' GATTGGATTATCACGCCAGAA3'<br>R:5' ACTCTTGTCAGGGCAGCATT3'    | 60                  | 201               |
| Tnfrsf21  | F:5' TGCCTTGACTGACCGAGAAT3'<br>R:5' CACTGCTTACACCGCACATC3'     | 60                  | 141               |
| Ptk2b     | F:5' CCTGCCTTGCCTTTGGTTAT3'<br>R:5' GTGTCTGTGCCAGAGTCCTT3'     | 60                  | 147               |
| Tnfrsf26  | F:5' GCTGTCCTGAGGGCAGAGTC3'<br>R:5' TGACGGGAGTAGCGAATGAA3'     | 60                  | 184               |
| Ankrd54   | F:5' TGGAGACCAAGAGCGAGCAG 3'<br>R:5' GAGCCGGATTTCCCAATTTC3'    | 60                  | 226               |
| Stk38l    | F:5' ATTTGCCCTGTTGGTTTGA3'<br>R:5' ATGTTGCGGTGGAGGTGAGA3'      | 60                  | 182               |

## 2 Supplementary Figure

**Supplementary Figure S1.** Expressions of m<sup>6</sup>A-related enzymes were detected by western blot analysis. n = 3-4; \**P* < 0.05. Ctrl, control; LPS, lipopolysaccharide.

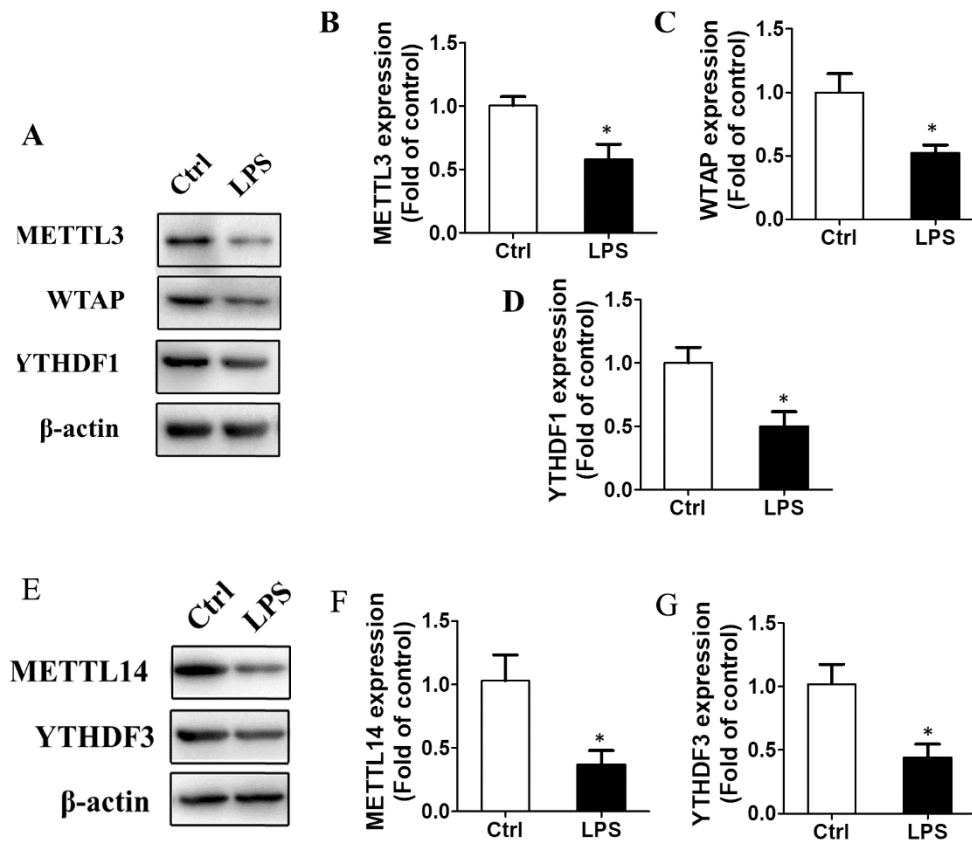

Supplement: DataSheet1.pdf [file DataSheet1.pdf]
